# Supplementary material
Source: MDPI journal article supplement (https://www.mdpi.com/2071-1050/12/5/1748)
Supplement: s1 [file s1]

| Order interview | Date       | Time     | Student | Sex | Age | Class | School          | Frequency and place of participation in FFF                                                                                               | Role with FFF   |
|-----------------|------------|----------|---------|-----|-----|-------|-----------------|-------------------------------------------------------------------------------------------------------------------------------------------|-----------------|
| 1               | 15-07-2019 | 7.00 pm  | JH      | m   | 14  | 8a    | KvC Eggenfelden | Begin of participation in May and until today every Friday on local school strikes in Eggenfelden.                                        | Organizing team |
| 2               | 15-07-2019 | 7.20 pm  | CR      | f   | 13  | 8a    | KvC Eggenfelden | Five times in Passau, one time to Munich and two times to Eggenfelden.                                                                    | Organizing team |
| 3               | 15-07-2019 | 7.40 pm  | LB      | f   | 14  | 8a    | KvC Eggenfelden | Four times I went to Passau and two times to Eggenfelden.                                                                                 | Organizing team |
| 4               | 15-07-2019 | 8.00pm   | FF      | m   | 14  | 8a    | KvC Eggenfelden | Two times to Passau and to times to Eggenfelden.                                                                                          | Organizing team |
| 5               | 15-07-2019 | 08.20 pm | GG      | m   | 14  | 8a    | KvC Eggenfelden | One time a went during school time and additionally during holidays. I organized a strike myself to times during holidays in Eggenfelden. | Organizing team |
| 6               | 15-07-2019 | 08.40 pm | FR      | m   | 13  | 8c    | KvC Eggenfelden | two times in March and May in Eggenfelden.                                                                                                | Participant     |
| 7               | 15-07-2019 | 09.00 pm | HG      | f   |     |       | KvC Eggenfelden | One time in Eggenfelden.                                                                                                                  | Participant     |
| 8               | 15-07-2019 | 09.20 pm | GH      | m   | 15  | 8d    | KvC Eggenfelden | Two times in Eggenfelden.                                                                                                                 | Participant     |
| 9               | 15-07-2019 | 09.40 pm | HU      | f   | 14  | 8d    | KvC Eggenfelden | One time in Eggenfelden.                                                                                                                  | Participant     |
| 10              | 15-07-2019 | 10.00 pm | MB      | m   | 14  | 8c    | KvC Eggenfelden | One time in Eggenfelden.                                                                                                                  | Participant     |

Reference:

J.,H., C.,R.; L.,B.; F.,F.; G.,G.; F.,R.; H.,G.; G.,H; H.,U; M.B, Participation in FFF, Personal Interview, 15.07.2019, Obergurgl

| Impression while participating in FFF                                                                                                                                                                                                                                         | Effects of participating in FFF                                                                                                                          | Influence of participation on feeling of being able to act climate-friendly                                                                                                                             | FFF_Auswirkung Teilnahme auf klimafreundliches Verhalten                                                                                                                                                                                                                                                                                      | Added value of FFF compared to school                                                                                                                                                                                                                                                                                                                                                                                                                                                                         |
|-------------------------------------------------------------------------------------------------------------------------------------------------------------------------------------------------------------------------------------------------------------------------------|----------------------------------------------------------------------------------------------------------------------------------------------------------|---------------------------------------------------------------------------------------------------------------------------------------------------------------------------------------------------------|-----------------------------------------------------------------------------------------------------------------------------------------------------------------------------------------------------------------------------------------------------------------------------------------------------------------------------------------------|---------------------------------------------------------------------------------------------------------------------------------------------------------------------------------------------------------------------------------------------------------------------------------------------------------------------------------------------------------------------------------------------------------------------------------------------------------------------------------------------------------------|
| a lot of people of various backgrounds and age groups are represented there, together they are marching there and are motivated                                                                                                                                               | It is the best incentive for a personal behavioral change and I will continue to act climate friendly at home.                                           | I realized that also a single person can achieve something if everyone does something. As a consequence, this reaches policy, especially the CDU (christ democratic union = conservative party called). | I follow reports in the media that deal with climate change.<br>I refuse car rides and substitute it by public transport or bicycle.<br>I discuss about climate change with friends and family.<br>I act on my friends and on my family to behave in a climate-friendly manner.<br>Before I buy a product, I think twice if I really need it. | That you can put school theory into practice and that you can get active yourself, what hasn't been communicated with k.i.d.Z.21.<br>k.i.d.Z.21 has just given an incentive - but is a great complement which I don't want to forgo.                                                                                                                                                                                                                                                                          |
| I was very happy that so many participated, in Munich there were over 10.000 people                                                                                                                                                                                           | not really                                                                                                                                               | The large crowd of people was really motivating.                                                                                                                                                        | I discuss about climate change with friends.<br>I act on my friends to behave in a climate-friendly manner.<br>Before I buy a product, I think twice if I really need it.                                                                                                                                                                     | Since participating in FFF I behave more climate-friendly, because you are involved actively. k.i.d.Z.21 is a duty and informs which is a good complement to FFF.<br>Within the scope of FFF, we additionally organize zero waste-workshops and for do-it-yourself plasticfree cosmetics.                                                                                                                                                                                                                     |
| There were 1.500 students in Passau - it's amazing, that so many young people pay attention to this topic and go on the streets.                                                                                                                                              | not really                                                                                                                                               | I realized, that I am able to reduce my emissions myself and similarly, that we can achieve something together.                                                                                         | I began to think more about if my everyday-life decisions are climate-friendly.<br>I discuss about climate change with friends and family .                                                                                                                                                                                                   | I realized the political deficiencies, means, what policy doesn't do.                                                                                                                                                                                                                                                                                                                                                                                                                                         |
| There, I really began to think what climate change actually means. It's getting warmer and soon there will be no snow anymore. My awareness has shifted.                                                                                                                      | There, I really began to think what climate change actually means. It's getting warmer and soon there will be no snow anymore. My awareness has shifted. | At the beginning I doubted if my action has an influence, then I thought, if every single one acts, it will have an effect.                                                                             | I refuse car rides and substitute it by public transport or bicycle.<br>Before I buy a product, I think twice if I really need it.                                                                                                                                                                                                            | Since participating in FFF I behave more climate-friendly, because you are involved actively. k.i.d.Z.21 is a duty and informs which is a good complement to FFF.                                                                                                                                                                                                                                                                                                                                             |
| at the protest I finally began to realize what actually happens.                                                                                                                                                                                                              | Time is running out, I deal more with the topic of climatechange (watching podcasts, asking, etc.) and it also affects my behavior.                      | With the large crowd of people I realized that many people are engaged with the topic of climate change.                                                                                                | I act on my friends and on my family to behave in a climate-friendly manner.<br>I don't buy products which are over-packaged.<br>I refuse meat.                                                                                                                                                                                               | In the course of k.i.d.Z.21 we started a creative project called bikeforfuture which gives incentives for biking to school in a competition format. But without FFF, the project had turned out in a boring presentation. Now, we integrate it into FFF while we ring our biking bells at the protests. We contacted firms ourselves for sponsoring and created an own logo and a webpage. The format can also be extended to other schools. FFF motivated to get into action yourself with everyday actions. |
| great, that in a little town like Eggenfelden 150 people have demonstrated. At the first time, also teachers and partents joined, but not at the second protest, that's a pity. Nevertheless it has to continue and finally the German parliament will pay attention to that. | climate change became more present, you think more about it. Not only among FFF participants, but in the public space in general.                        | You feel stronger in the group and also effect something in policy.                                                                                                                                     | I act on my friends and on my family to behave in a climate-friendly manner.<br>I refuse car rides and substitute it by public transport or bicycle.<br>I discuss about climate change with friends.<br>Before I buy a product, I think twice if I really need it.                                                                            | k.i.d.Z.21 offers the tools which go great with FFF. FFF shows that you can stand up for something and that it is important to do something for the future. I think that everyone who participates also behaves climate friendly and that's why I don't understand why our school bans this.                                                                                                                                                                                                                  |
| I especially liked the community feeling and that you scream for something good, our future and environment will turn out good                                                                                                                                                | I am dealing more with the topic of climate change.                                                                                                      | I don't know                                                                                                                                                                                            | not really                                                                                                                                                                                                                                                                                                                                    | I observed that the FFF- organization team of our class acquires organizational skills, like providing information to policy or the city council.                                                                                                                                                                                                                                                                                                                                                             |
| reduce my own carbon footprint and eat less                                                                                                                                                                                                                                   |                                                                                                                                                          | The shere participation did not have an effect, but I tried to persuade others to participate in FFF, because there are only 9 years left for reducing our carbon emissions.                            | I don't buy products which are over-packaged.                                                                                                                                                                                                                                                                                                 | with FFF I realized that I can't heavily rely on adults, but I have to act self-responsibly.                                                                                                                                                                                                                                                                                                                                                                                                                  |
| at the beginning it was strange                                                                                                                                                                                                                                               | I had a bad conscience when I could not particpate in FFF.                                                                                               |                                                                                                                                                                                                         | I refuse car rides and substitute it by public transport or bicycle.<br>I act on my friends to behave in a climate-friendly manner.                                                                                                                                                                                                           | FFF shows how important, strong and present climate change is. k.i.d.Z.21 is a duty - you do it for the project, for the presentation.                                                                                                                                                                                                                                                                                                                                                                        |
| it was great because it was not commonplace                                                                                                                                                                                                                                   | Not really, because I already had a knowledge base before. Indeed, that you can't fully rely on adults and that you have to get into action yourself.    | Indeed, because sometimes you have the feeling to be all on your own, but when you are part of the movement and see, that all people fight for a common future, then this is great.                     | participating in FFF lifted all categories of climate-friendly behavior except for visitin information events                                                                                                                                                                                                                                 |                                                                                                                                                                                                                                                                                                                                                                                                                                                                                                               |
