# Supplementary material
Source: MDPI journal article supplement (https://www.mdpi.com/2071-1050/12/5/1748)
Supplement: s1 [file s1]

**Table 1.** Constructs composed of different items and their statistical characteristics differentiated between FFF-participants (N=53) and other students (N=116) within the whole sample (N=169) comparing the pre- and post-test after the *k.i.d.Z. 21 – competent into the future* learning initiative. Significant changes of FFF-participants, but not occurring among other students are marked in yellow.

| Total N=169<br>FFF N= 53<br>OS N=116                                                                                      | FFF<br>M <sub>pre</sub> | FFF<br>M <sub>post</sub> | FFF<br>SD <sub>pre</sub> | FFF<br>SD <sub>post</sub> | OS<br>M <sub>pre</sub> | OS<br>M <sub>post</sub> | OS<br>SD <sub>pre</sub> | OS<br>SD <sub>post</sub> | Significance<br>(2- tailed)<br>FFF/OS | t-value <sub>FFF/OS</sub> | t <sub>FFF/OS</sub> |
|---------------------------------------------------------------------------------------------------------------------------|-------------------------|--------------------------|--------------------------|---------------------------|------------------------|-------------------------|-------------------------|--------------------------|---------------------------------------|---------------------------|---------------------|
| <b>Knowledge (6-Likert Scale: surely false – surely right)</b>                                                            |                         |                          |                          |                           |                        |                         |                         |                          |                                       |                           |                     |
| Evaluate the subsequent statements in respect to their accuracy.                                                          |                         |                          |                          |                           |                        |                         |                         |                          |                                       |                           |                     |
| <b>Right answers (in total 7)</b>                                                                                         | <b>3.22</b>             | <b>4.04</b>              | <b>1.37</b>              | <b>1.42</b>               | <b>3.15</b>            | <b>3.64</b>             | <b>1.35</b>             | <b>1.66</b>              | <b>.000*/.005*</b>                    | <b>-3.972/-2.891</b>      | <b>.48/.28</b>      |
| selected examples:                                                                                                        |                         |                          |                          |                           |                        |                         |                         |                          |                                       |                           |                     |
| Summer tourism in the Alps will gain increasing importance due to climate change.                                         | 2.79                    | 3.23                     | 2.30                     | 2.38                      | 2.39                   | 3.31                    | 2.38                    | 2.19                     | .309/.003*                            |                           |                     |
| One of many impacts of climate change is an increasing erosion of soil.                                                   | 1.58                    | 2.68                     | 2.87                     | 2.91                      | 1.22                   | 2.65                    | 2.61                    | 2.64                     | .017*/.000*                           |                           |                     |
| <b>False answers (in total 6)</b>                                                                                         | <b>1.50</b>             | <b>1.83</b>              | <b>1.00</b>              | <b>1.08</b>               | <b>1.86</b>            | <b>2.19</b>             | <b>1.10</b>             | <b>1.39</b>              | <b>.032*/.030*</b>                    | <b>-2.198/-2.203</b>      | <b>.29/.21</b>      |
| selected examples:                                                                                                        |                         |                          |                          |                           |                        |                         |                         |                          |                                       |                           |                     |
| Without greenhouse gases Europe would be a ice desert.                                                                    | 0.81                    | 1.55                     | 2.03                     | 2.48                      | 1.02                   | 2.10                    | 2.15                    | 2.50                     | .039*/.001*                           |                           |                     |
| A change in the economic production is only necessary if the most important resources of the earth are totally exploited. | 1.17                    | 1.51                     | 1.37                     | 1.34                      | 1.29                   | 2.12                    | 1.86                    | 2.03                     | .135/.001*                            |                           |                     |

| Personal Concern (6-Likert Scale: not affected at all – totally affected) | 4.49        | 4.79        | .92         | .70        | 4.50        | 4.61        | .89         | .83        | .009*/.201        | -2.698/-        | .35/-        |
|---------------------------------------------------------------------------|-------------|-------------|-------------|------------|-------------|-------------|-------------|------------|-------------------|-----------------|--------------|
| Which persons' life is affected by climate change in your opinion?        |             |             |             |            |             |             |             |            |                   |                 |              |
| <b>Concern "myself"</b>                                                   |             |             |             |            |             |             |             |            |                   |                 |              |
| My life today                                                             | 3.25        | 3.70        | 1.33        | 1.14       | 3.46        | 3.47        | 1.28        | 1.28       | .022*/.951        | -2.364/-        | .31/-        |
| My life in 20 years                                                       | 5.15        | 5.36        | .99         | .83        | 4.97        | 5.21        | 1.15        | 1.11       | .086/.033*        | -/-2.156        | -/.20        |
| <b>Concern "my family"</b>                                                |             |             |             |            |             |             |             |            |                   |                 |              |
| The life of my family today                                               | 3.28        | 3.70        | 1.39        | 1.12       | 3.36        | 3.47        | 1.26        | 1.28       | .026*/.459        | -2.286/-        | .30/-        |
| The life of my family in 20 years                                         | 5.15        | 5.36        | .91         | .86        | 4.93        | 5.17        | 1.23        | 1.11       | .078/.050         |                 |              |
| <b>Concern "others" (today)</b>                                           | <b>4.19</b> | <b>4.53</b> | <b>1.26</b> | <b>.89</b> | <b>4.37</b> | <b>4.27</b> | <b>1.03</b> | <b>.98</b> | <b>.044*/.307</b> | <b>-2.060/-</b> | <b>.27/-</b> |
| The life of people in Europe today                                        | 3.91        | 4.09        | 1.31        | 1.01       | 4.00        | 3.91        | 1.19        | 1.14       | .268/.431         |                 |              |
| The life of people worldwide today                                        | 4.47        | 4.96        | 1.37        | .96        | 4.74        | 4.63        | 1.07        | 1.06       | .016*/.325        |                 |              |
| <b>Concern "others" (in 20 years)</b>                                     | <b>5.37</b> | <b>5.59</b> | <b>.89</b>  | <b>.61</b> | <b>5.27</b> | <b>5.51</b> | <b>1.05</b> | <b>.77</b> | <b>.071/.018*</b> | <b>-/-2.396</b> | <b>-/.22</b> |
| The life of people in Europe in 20 years                                  | 5.26        | 5.35        | .92         | .77        | 5.13        | 5.39        | 1.13        | .90        | .172/.026*        |                 |              |
| The life of people in worldwide in 20 years                               | 5.47        | 5.74        | .91         | .56        | 5.41        | 5.65        | 1.08        | .78        | .047*/.029*       |                 |              |

|                                                                                                        |             |             |             |             |             |             |             |             |                      |                        |                  |
|--------------------------------------------------------------------------------------------------------|-------------|-------------|-------------|-------------|-------------|-------------|-------------|-------------|----------------------|------------------------|------------------|
| <b>Responsibility (6-Likert Scale: I do not agree at all – I totally agree)</b>                        | 5.19        | 5.37        | .65         | .61         | 4.78        | 4.84        | .84         | .93         | .079 / .545          |                        |                  |
| <b>Responsibility of “myself”</b>                                                                      | <b>5.47</b> | <b>5.68</b> | <b>.75</b>  | <b>.67</b>  | <b>5.07</b> | <b>5.22</b> | <b>1.27</b> | <b>1.13</b> | <b>.086/.255</b>     |                        |                  |
| It is my personal responsibility to behave in a climate friendly manner.                               |             |             |             |             |             |             |             |             |                      |                        |                  |
| <b>Responsibility of “others”</b>                                                                      | <b>5.13</b> | <b>5.31</b> | <b>.71</b>  | <b>.66</b>  | <b>4.73</b> | <b>4.77</b> | <b>.83</b>  | <b>.96</b>  | <b>.105/.678</b>     |                        |                  |
| It is up to politics to foster climate friendly behavior (e.g. by means of laws or financial support). | 5.26        | 5.49        | .90         | .82         | 4.98        | 5.08        | 1.09        | 1.22        | .096 / .442          |                        |                  |
| It is up to science to do research on climate changes and its impacts.                                 | 5.15        | 5.32        | 1.18        | .89         | 4.84        | 5.03        | 1.15        | 1.16        | .328 / .170          |                        |                  |
| It is up to economies to produce climate friendly products, even if it is expensive.                   | 5.08        | 5.13        | 1.09        | .96         | 4.60        | 4.73        | 1.18        | 1.07        | .764 / .355          |                        |                  |
| It is up to organizations like Greenpeace to promote the protection of climate.                        | 5.11        | 5.13        | 1.03        | 1.18        | 4.60        | 4.43        | 1.36        | 1.39        | .926 / .250          |                        |                  |
| It is up to adults to behave in a climate friendly manner.                                             | 5.04        | 5.49        | 1.04        | .82         | 4.61        | 4.58        | 1.43        | 1.52        | .006* / .833         |                        |                  |
| <b>Self-efficacy (6-Likert Scale: really poorly - really well)</b>                                     | <b>3.02</b> | <b>3.60</b> | <b>.97</b>  | <b>1.06</b> | <b>3.54</b> | <b>3.79</b> | <b>1.04</b> | <b>1.21</b> | <b>.001* / .019*</b> | <b>-3.373 / -2.375</b> | <b>.42 / .22</b> |
| How well do you feel prepared regarding the changes induced by climate change?                         |             |             |             |             |             |             |             |             |                      |                        |                  |
| <b>Locus of Control (6-Likert Scale: I do not agree at all – I totally agree)</b>                      | <b>4.92</b> | <b>5.33</b> | <b>1.12</b> | <b>.86</b>  | <b>4.76</b> | <b>5.14</b> | <b>1.06</b> | <b>.89</b>  | <b>.003* / .000*</b> | <b>-3.089 / -3.935</b> | <b>.39 / .34</b> |
| I am able to contribute in reducing the magnitude of climate change.                                   | 5.09        | 5.42        | 1.43        | .95         | 5.00        | 5.12        | 1.27        | 1.23        | .104 / .402          |                        |                  |
| If world society collaborates, global warming can be limited to few degrees (plus 2-4°C).              | 4.77        | 5.43        | 1.22        | 1.02        | 4.46        | 4.97        | 1.37        | 1.14        | .007* / .001*        |                        |                  |
| I am able to reduce my CO <sub>2</sub> -emission.                                                      | 4.70        | 5.21        | 1.45        | 1.20        | 4.65        | 5.28        | 1.56        | 1.01        | .013* / .000*        |                        |                  |



|                                                                                                 |             |             |             |             |             |             |             |             |                    |  |  |
|-------------------------------------------------------------------------------------------------|-------------|-------------|-------------|-------------|-------------|-------------|-------------|-------------|--------------------|--|--|
| <b>Waste separation</b>                                                                         | <b>5.32</b> | <b>5.49</b> | <b>.87</b>  | <b>.80</b>  | <b>5.18</b> | <b>5.08</b> | <b>1.04</b> | <b>1.11</b> | <b>.245/.339</b>   |  |  |
| I separate waste, so that it can be recycled.                                                   |             |             |             |             |             |             |             |             |                    |  |  |
| <b>Alimentation</b>                                                                             | <b>2.19</b> | <b>3.08</b> | <b>1.46</b> | <b>1.72</b> | <b>2.40</b> | <b>2.66</b> | <b>1.53</b> | <b>1.54</b> | <b>.001*/.061</b>  |  |  |
| I forego eating meat.                                                                           |             |             |             |             |             |             |             |             |                    |  |  |
| <b>Consume</b>                                                                                  | <b>4.01</b> | <b>4.45</b> | <b>.86</b>  | <b>.74</b>  | <b>3.73</b> | <b>4.08</b> | <b>1.04</b> | <b>1.03</b> | <b>.002*/.000*</b> |  |  |
| I try to repair things before throwing them away and buying something new.                      | 4.77        | 5.02        | 1.17        | .89         | 4.39        | 4.52        | 1.39        | 1.34        | .220/.397          |  |  |
| Before I buy a product, I think about if I really need it.                                      | 4.26        | 4.53        | 1.32        | 1.05        | 4.10        | 4.34        | 1.47        | 1.47        | .184/.074          |  |  |
| I don't buy products which are over-packaged.                                                   | 3.96        | 4.74        | 1.33        | .90         | 3.67        | 4.14        | 1.27        | 1.18        | .000*/.000*        |  |  |
| When I buy a new product, I consider that it does not consume that much energy.                 | 3.06        | 3.53        | 1.45        | 1.42        | 2.76        | 3.34        | 1.58        | 1.44        | .061/.000*         |  |  |
| <b>Mobility</b>                                                                                 | <b>3.80</b> | <b>4.14</b> | <b>.98</b>  | <b>1.01</b> | <b>3.41</b> | <b>3.77</b> | <b>1.29</b> | <b>1.30</b> | <b>.012*/.004*</b> |  |  |
| I forego going by car (e.g. as well as passenger), instead I go by bicycle or public transport. | 4.43        | 4.49        | 1.12        | 1.15        | 3.67        | 3.97        | 1.50        | 1.32        | .754/.037*         |  |  |
| I forego going by airplane.                                                                     | 3.17        | 3.79        | 1.71        | 1.66        | 3.15        | 3.57        | 1.96        | 1.80        | .009*/.018*        |  |  |

<sup>2</sup> FFF = Fridays For Future participants; OS = other students; M = mean; SD = standard deviation; SR = scale reliability; pre = pre-test; post = post-test; r = effect size; \* significant result (p < .05)
